# Supplementary material for: The growth and assembly of the multidimensional hierarchical Ni3S2 for aqueous asymmetric supercapacitors
Source: Royal Society of Chemistry journal article supplement (doi:10.1039/c4ce02558j), 2015-01-01
Supplement: c4ce02558j1.pdf [file c4ce02558j1.pdf]

## **Electronic Supporting Information**

### **One-step dissolution-precipitation route synthesis of the multidimensional hierarchical Ni<sub>3</sub>S<sub>2</sub> for aqueous asymmetric supercapacitors**

Bin Yang, Lei Yu, Qi Liu, Jingyuan Liu,\* Wanlu Yang, Hongsen Zhang, Feihong Wang, Songxia Hu, Yi Yuan, Jun Wang \*

Key Laboratory of Superlight Material and Surface Technology, Ministry of Education, Harbin Engineering University, 150001, P. R. China

\*E-mail address: zhqw1888@sohu.com.

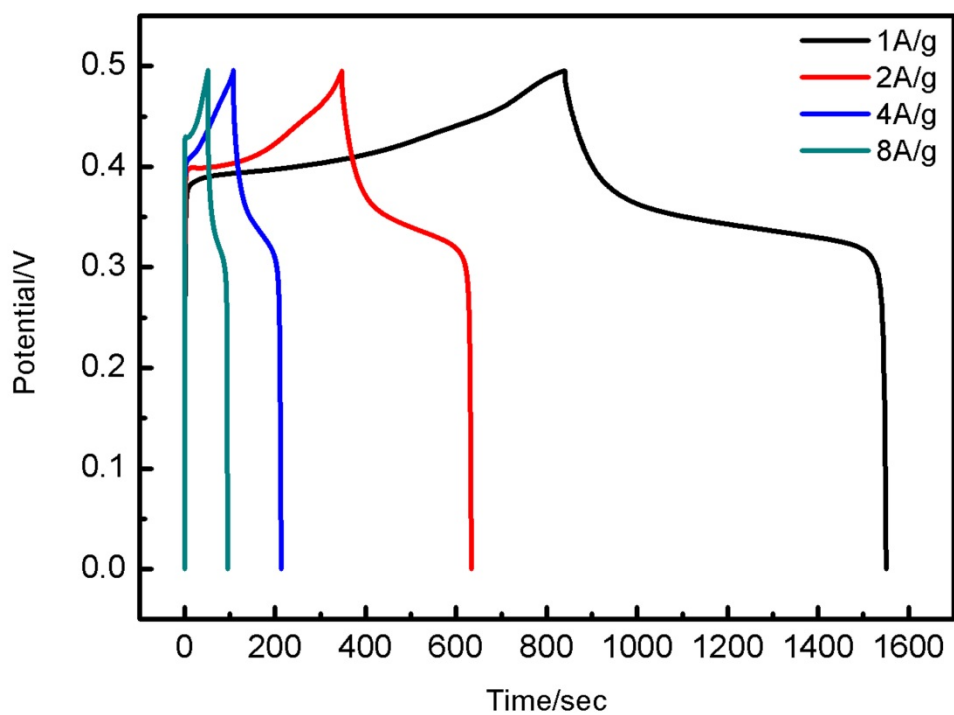

Fig. S1: charge-discharge curves of nanorods  $\text{Ni}_3\text{S}_2$  arrays at different current densities.

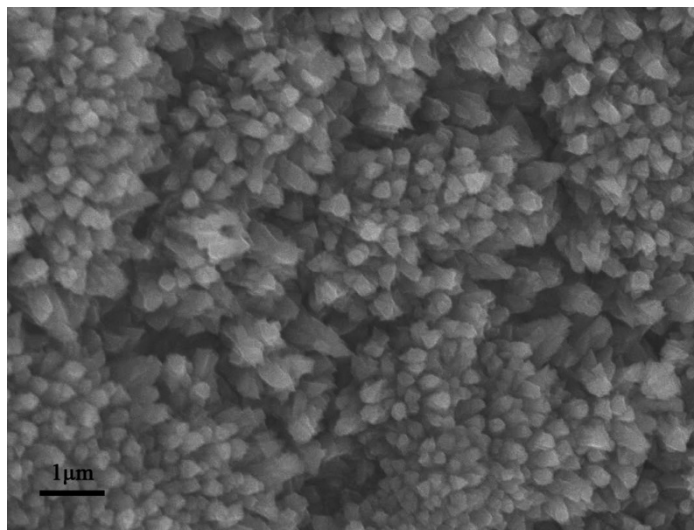

Fig. S2: SEM image of the mushroom-like Ni<sub>3</sub>S<sub>2</sub> electrode after 5000 cycles.

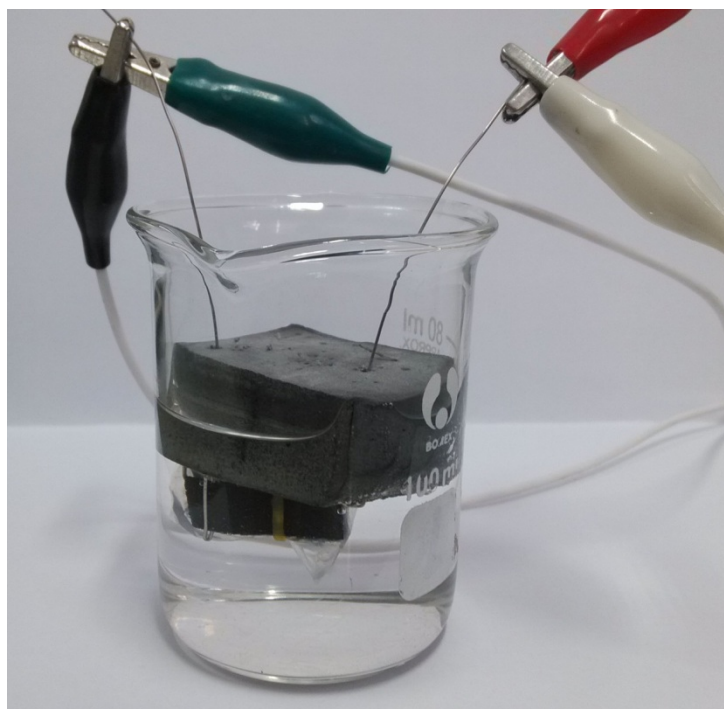

Fig.S3: the photography of the asymmetric supercapacitor.

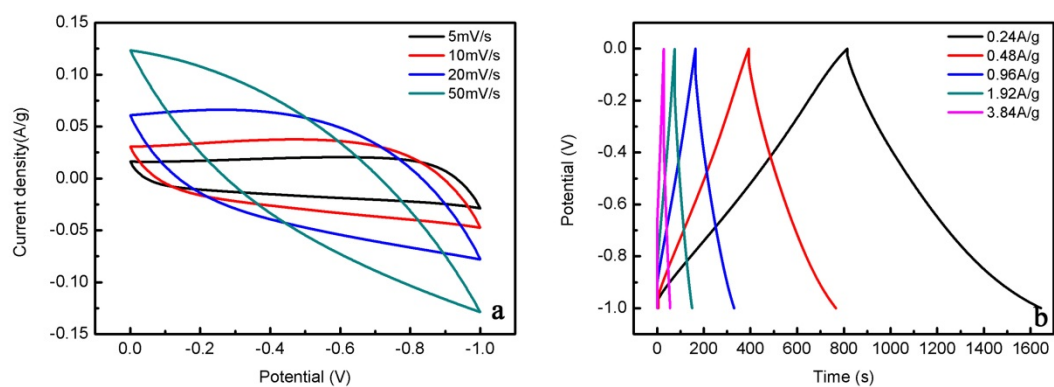

Fig. S4: (a) CV curves of AC electrode at different scan rate, (b) charge-discharge curves of AC electrode at different current densities.

|                         | $R_s(\Omega)$ | $C_{DL}(F)$ | $R_{ct}(\Omega)$ | $Z_w(\Omega)$ | $C_L(F)$ |
|-------------------------|---------------|-------------|------------------|---------------|----------|
| Nanorods $Ni_3S_2$      | 1.299         | 0.01273     | 3.803            | 4.122         | 0.4402   |
| Mushroom-like $Ni_3S_2$ | 0.9745        | 0.01698     | 3.121            | 2.763         | 0.449    |

**Table S1.** Calculated Values of  $R_s$ ,  $C_{DL}$ ,  $R_{ct}$ ,  $Z_w$  and  $C_L$  through CNLS Fitting of the Experimental Impedance Spectra Based on the Proposed Equivalent Circuit in Figure 6.
